# Supplementary material for: Compound Risk of Air Pollution and Heat Days and the Influence of Wildfire by SES across California, 2018–2020: Implications for Environmental Justice in the Context of Climate Change
Source: MDPI journal article supplement (doi:10.3390/cli10100145), 2022-10-01
Supplement: s1 [file s1]

## Supplemental Materials

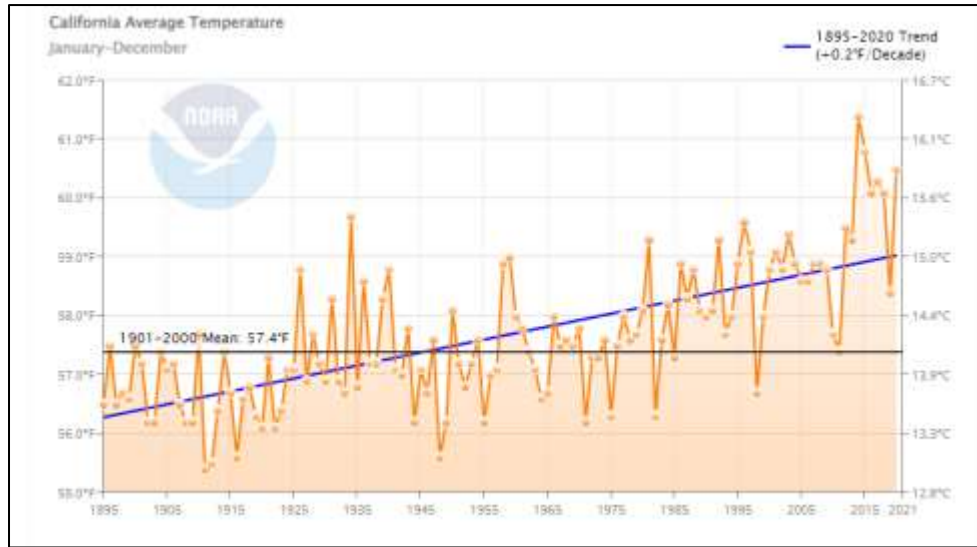

**Figure S1.** California annual average temperature (Source: U.S. National Oceanic and Atmospheric Administration).

**Table S1.** Summary of socioeconomic characteristic across census tracts grouped by the frequency of their estimated CR days/year.

|                                 | CR Days/Year |         |         |         |         |
|---------------------------------|--------------|---------|---------|---------|---------|
|                                 | 0            | 0-1     | 1-6     | 6-10    | >10     |
| Asian Residents (%)             | 14.0         | 13.2    | 15.2    | 12.9    | 12.5    |
| Hispanic Residents (%)          | 37.9         | 38.2    | 33.1    | 30.6    | 27.8    |
| Native American Residents (%)   | 0.8          | 0.9     | 1.0     | 0.8     | 0.9     |
| African American Residents (%)  | 6.0          | 5.6     | 11.6    | 11.3    | 7.5     |
| Households without Computer (%) | 8.3          | 10.0    | 10.6    | 10.3    | 11.9    |
| Households without Internet (%) | 15.6         | 17.9    | 20.9    | 22.6    | 21.4    |
| Poverty Rate (%)                | 10.2         | 13.0    | 19.7    | 16.2    | 16.0    |
| Unemployed (%)                  | 6.6          | 7.7     | 10.2    | 9.9     | 7.5     |
| Income < \$35K (%)              | 25.1         | 28.8    | 41.5    | 35.0    | 37.1    |
| Income > \$100K (%)             | 35.7         | 30.7    | 17.8    | 21.0    | 27.4    |
| Median Home Value (\$)          | 79,781       | 70,920  | 48,794  | 61,278  | 61,898  |
| Median Household Income (\$)    | 579,351      | 413,275 | 278,269 | 387,746 | 422,588 |

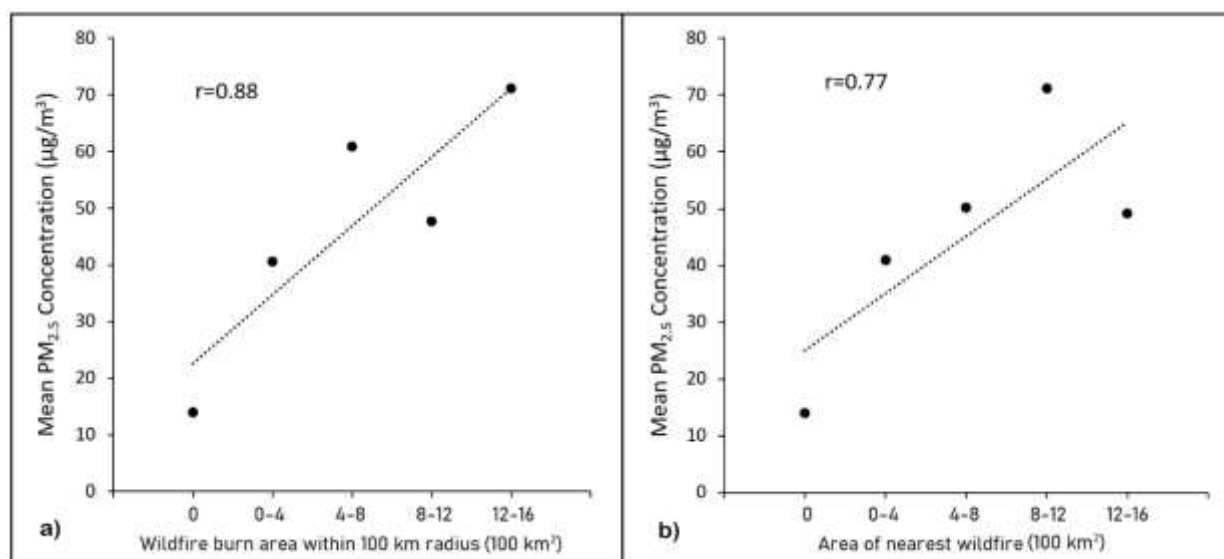

**Figure S2.** Scatter plots of average daily PM<sub>2.5</sub> concentrations as measured by PurpleAir sensors grouped according to the a) wildfire burn area reported within 100 km of a sensor on the same day of PM<sub>2.5</sub> measurement and b) the same-day burn area of the nearest wildfire.
